# Supplementary material for: Probing the Interactions of Sulfur-Containing Histidine Compounds with Human Gamma-Glutamyl Transpeptidase
Source: PubMed Central journal article supplement (PMC6949936; doi:10.3390/md17120650), 2019-11-20
Supplement: marinedrugs-17-00650-s001.pdf [file marinedrugs-17-00650-s001.pdf]

# Probing the interactions of sulfur-containing histidine compounds with human gamma-glutamyl transpeptidase

Alfonsina Milito<sup>1</sup>, Mariarita Brancaccio<sup>1</sup>, Michael Lisurek<sup>2</sup>, Mariorosario Masullo<sup>3</sup>, Anna Palumbo<sup>1</sup>, Immacolata Castellano<sup>1,\*</sup>

<sup>1</sup> Dept. of Biology and Evolution of Marine Organisms, Stazione Zoologica Anton Dohrn, Naples (Italy)

<sup>2</sup> Dept. of Computational Chemistry and Drug Design, Leibniz-Forschungsinstitut für Molekulare Pharmakologie, Berlin (Germany)

<sup>3</sup> Dept. of Human Movement Sciences and Wellbeing, University of Naples "Parthenope", Naples (Italy)

**Table S1.** Cytotoxicity assay on HEK 293 cells. Cell vitality raw data were reported as units of fluorescence following the treatment with 5-thio for 24 and 48h (n=3).

| Condition          | Average $\pm$ SD |
|--------------------|------------------|
| NT 24h             | 4717 $\pm$ 153   |
| 5-thio 5 $\mu$ M   | 6452 $\pm$ 108   |
| 5-thio 20 $\mu$ M  | 5470 $\pm$ 71    |
| 5-thio 50 $\mu$ M  | 4490 $\pm$ 22    |
| 5-thio 100 $\mu$ M | 4395 $\pm$ 5     |
| NT 48h             | 7794 $\pm$ 105   |
| 5-thio 5 $\mu$ M   | 9353 $\pm$ 76    |
| 5-thio 20 $\mu$ M  | 8969 $\pm$ 20    |
| 5-thio 50 $\mu$ M  | 8869 $\pm$ 52    |
| 5-thio 100 $\mu$ M | 8557 $\pm$ 205   |

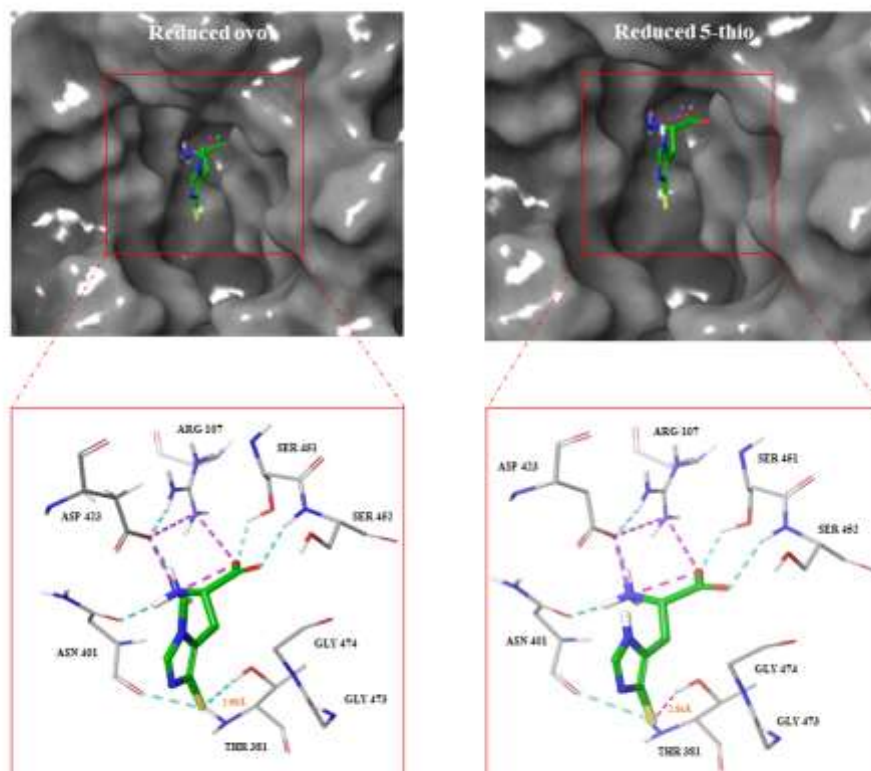

**Figure S1. Molecular interactions of the reduced ovo and 5-thio within hGGT active site.** On top: hGGT surface view from docking simulations; on bottom: interactions among ovo/5-thio and key residues in the active site of hGGT. Carbon atoms of the active site residues are *colored light grey*, compared to carbon atoms of the ligands which are *colored green*. Oxygen atoms are *colored red*, nitrogen *blue*, sulfur *yellow*, polar hydrogens *white*. Non polar hydrogens were hidden. Dashed blue and magenta lines represent hydrogen bonds and salt bridges, respectively. Molecular distance between ovo/5-thio and OH- of Thr381 are written in orange.
